1 A refined set of rRNA-targeted oligonucleotide probes for *in situ*  
2 detection and quantification of ammonia-oxidizing bacteria

3

4 Michael Lukumbuza <sup>a,\*</sup>, Jannie Munk Kristensen <sup>b,\*</sup>, Katharina Kitzinger <sup>a,c</sup>, Andreas  
5 Pommerening-Röser <sup>d</sup>, Per Halkjær Nielsen <sup>b</sup>, Michael Wagner <sup>a,b,e,f</sup>, Holger Daims <sup>a,f</sup>, Petra  
6 Pjevac <sup>a,e</sup>

7

8 <sup>a</sup> University of Vienna, Centre for Microbiology and Environmental Systems Science, Division  
9 of Microbial Ecology, Vienna, Austria.

10 <sup>b</sup> Center for Microbial Communities, Department of Chemistry and Bioscience, Aalborg  
11 University, Aalborg, Denmark.

12 <sup>c</sup> Max Planck Institute for Marine Microbiology, Bremen, Germany.

13 <sup>d</sup> University of Hamburg, Institute of Plant Science and Microbiology, Microbiology and  
14 Biotechnology, Hamburg, Germany.

15 <sup>e</sup> Joint Microbiome Facility of the Medical University of Vienna and the University of Vienna,  
16 Vienna, Austria.

17 <sup>f</sup> University of Vienna, The Comammox Research Platform, Vienna, Austria.

18 \* equal contributions

19 Corresponding author: Holger Daims, e-mail: [holger.daims@univie.ac.at](mailto:holger.daims@univie.ac.at)

20 **Abstract**

21 Ammonia-oxidizing bacteria (AOB) of the betaproteobacterial genera *Nitrosomonas* and  
22 *Nitrospira* are key nitrifying microorganisms in many natural and engineered ecosystems.  
23 Since many AOB remain uncultured, fluorescence *in situ* hybridization (FISH) with rRNA-  
24 targeted oligonucleotide probes has been one of the most widely used approaches to study the  
25 community composition, abundance, and other features of AOB directly in environmental  
26 samples. However, the established and widely used AOB-specific 16S rRNA-targeted FISH  
27 probes were designed up to two decades ago, based on much smaller rRNA gene sequence  
28 datasets than available today. Several of these probes cover their target AOB lineages  
29 incompletely and suffer from a weak target specificity, which causes cross-hybridization of  
30 probes that should detect different AOB lineages. Here, a set of new highly specific 16S rRNA-  
31 targeted oligonucleotide probes was developed and experimentally evaluated that complements  
32 the existing probes and enables the specific detection and differentiation of the known, major  
33 phylogenetic clusters of betaproteobacterial AOB. The new probes were successfully applied  
34 to visualize and quantify AOB in activated sludge and biofilm samples from seven pilot- and  
35 full-scale wastewater treatment systems. Based on its improved target group coverage and  
36 specificity, the refined probe set will facilitate future *in situ* analyses of AOB.

37

38 **Keywords**

39 Fluorescence *in situ* hybridization; ammonia-oxidizing bacteria; nitrification; wastewater  
40 treatment plants; oligonucleotide probes

## 41 1. Introduction

42 Nitrification, a key process in the biogeochemical nitrogen cycle, is the microbially mediated  
43 oxidation of ammonia to nitrite and subsequently to nitrate. For many decades nitrification was  
44 perceived as a process always performed by two functional groups of aerobic,  
45 chemolithoautotrophic microorganisms in cooperation: the ammonia oxidizing bacteria (AOB)  
46 and archaea (AOA), which oxidize ammonia to nitrite, and the nitrite oxidizing bacteria (NOB)  
47 that oxidize nitrite to nitrate (Bock and Wagner, 2001; Daims et al., 2016; Könneke et al.,  
48 2005). Only recently, complete ammonia oxidizers (comammox organisms) have been  
49 discovered, which carry out the entire nitrification process alone (Daims et al., 2015; van  
50 Kessel et al., 2015).

51 Currently, all known canonical AOB, oxidizing ammonia to nitrite, belong to one of two  
52 phylogenetic lineages within the Proteobacteria. Gammaproteobacterial AOB include the  
53 genus *Nitrosococcus*, which is halophilic and occurs in marine habitats and salt lakes  
54 (Campbell et al., 2011), and the genus *Nitrosoglobus*, which contains acidotolerant AOB from  
55 acidic soils (Hayatsu et al., 2017). In contrast, the AOB that usually dominate in terrestrial and  
56 freshwater ecosystems belong to the family *Nitrosomonadaceae* within the (now obsolete,  
57 Parks et al., 2018) taxonomic class of Betaproteobacteria (Prosser et al., 2014). Here, we refer  
58 to these organisms as  $\beta$ -AOB. All cultivated and described members of the family  
59 *Nitrosomonadaceae* are chemolithoautotrophic AOB from the genera *Nitrosomonas* and  
60 *Nitrospira* (Prosser et al., 2014). Representatives of  $\beta$ -AOB are found in almost all oxic  
61 environments but are particularly successful in nutrient rich habitats such as fertilized soils or  
62 eutrophic freshwater sediments, and also the majority of wastewater treatment plants (WWTPs)  
63 (Bollmann et al., 2014; Di et al., 2010; Fan et al., 2011; Verhamme et al., 2011). The low  
64 abundance of AOA in activated sludge from most municipal WWTPs (Gao et al., 2013;  
65 Mußmann et al., 2011; Wells et al., 2009) has recently been attributed to their sensitivity to

66 copper limitation caused by chemical complexation of copper by organic compounds (Gwak  
67 et al., 2019). This effect likely contributes to the commonly observed predominance of  $\beta$ -AOB  
68 in these engineered environments.

69 Despite their ubiquity,  $\beta$ -AOB have proven to be exceptionally fastidious and recalcitrant to  
70 cultivation. Hence, the number of  $\beta$ -AOB isolates with standing in nomenclature (Parte, 2014)  
71 remains low (n=14) despite their broad environmental distribution and high ecological  
72 significance. To overcome this problem, researchers use cultivation-independent molecular  
73 techniques for studying various aspects of AOB diversity and ecophysiology. One of the most  
74 commonly applied molecular methods is rRNA-targeted fluorescence *in situ* hybridization  
75 (FISH). This approach uses rRNA-targeted oligonucleotide probes, which are covalently linked  
76 to fluorescent dyes and hybridize to the ribosomal RNA of specific microbial populations  
77 (Amann et al., 1995; DeLong et al., 1989). The resulting fluorescence signal allows the *in situ*  
78 detection and visualization of target organisms in environmental samples. FISH has numerous  
79 applications in microbial ecology, which include the *in situ* abundance quantification of  
80 populations (Daims and Wagner, 2007; Wagner et al., 1994), and quantitative analyses of the  
81 spatial distribution of microorganisms in biofilms and other structurally complex samples  
82 (Almstrand et al., 2013; Daims et al., 2006; Dolinšek et al., 2013; Schillinger et al., 2012;  
83 Welch et al., 2016). Combinations of FISH with chemical imaging techniques like  
84 microautoradiography (Lee et al., 1999), Raman microspectroscopy (Fernando et al., 2019;  
85 Huang et al., 2007), and nanometer scale secondary ion mass spectroscopy (NanoSIMS) (Berry  
86 et al., 2013; Musat et al., 2012) even permit cultivation-independent physiological studies of  
87 discrete microbial populations. FISH can also be used together with bioorthogonal  
88 noncanonical amino acid tagging (BONCAT), which is another powerful approach to detect  
89 metabolically active microorganisms *in situ* (Hatzenpichler et al., 2014).

90 FISH has been applied since 1995 (Wagner et al., 1995) in numerous studies to investigate  $\beta$ -  
91 AOB in aquatic systems, especially WWTPs, and has proven to be of immense value in this  
92 context. For example, *Nitrosomonas* (formerly “*Nitrosococcus*”) *mobilis* was identified as the  
93 dominant AOB in an industrial WWTP (Juretschko et al., 1998) and later isolated from  
94 activated sludge by FISH-assisted screening and propagation of sorted microcolonies (Fujitani  
95 et al., 2015). FISH and image analysis were used to quantify the spatial localization patterns of  
96  $\beta$ -AOB in nitrifying biofilms (Almstrand et al., 2013; Gruber-Dorninger et al., 2015, p.;  
97 Maixner et al., 2006). By combining FISH detection with microsensor measurements of  
98 substrate concentration gradients, both the distribution and activities of  $\beta$ -AOB in biofilms  
99 were studied (Okabe et al., 1999; Schramm et al., 1998). Application of this approach to  
100 calculate volumetric reaction rates even revealed the *in situ* whole-cell kinetics of uncultured  
101  $\beta$ -AOB (*Nitrospira* spp.) (Schramm et al., 1999). In another study, FISH and quantitative  
102 PCR (qPCR) were used to detect  $\beta$ -AOB in granular activated sludge. These data were the basis  
103 for two ecophysiological models, which address the observed (and unexpected) higher *in situ*  
104 abundances of NOB over AOB in the granules (Winkler et al., 2012). FISH was also used to  
105 quantify the abundance dynamics of diverse  $\beta$ -AOB and anaerobic ammonium oxidizers  
106 (anammox) in ammonium- or urea-fed enrichments, revealing different substrate preferences  
107 of the populations (Sliemers et al., 2004), and to analyze the spatial organization of  $\beta$ -AOB and  
108 anammox organisms in nitrogen-removing biofilms (Pynaert et al., 2003). Since the validation  
109 of methods is crucial, a recent comparison of FISH and qPCR as tools to quantify the  
110 abundance of  $\beta$ -AOB deserves attention. It revealed that FISH and *amoA*-targeted qPCR  
111 yielded consistent results and were superior to qPCR of 16S rRNA genes (Baptista et al., 2014).  
112 These and many other studies used a well-established set of rRNA-targeted oligonucleotide  
113 probes to detect all  $\beta$ -AOB or their sublineages by FISH (Adamczyk et al., 2003; Juretschko et  
114 al., 2002, 1998; Mobarry et al., 1996; Wagner et al., 1995). However, the most commonly used

115 probes were designed based on a much more limited set of 16S rRNA sequences from  $\beta$ -AOB  
116 than is available now, and they do not cover the entire diversity of  $\beta$ -AOB represented in  
117 current databases. Moreover, inconsistent *in situ* hybridization patterns were observed, which  
118 suggested that some of these probes hybridize to  $\beta$ -AOB outside the expected target groups  
119 (Gruber-Dorninger et al., 2015). An incomplete probe coverage and weak specificity can  
120 introduce a significant bias in studies that rely on these probes to detect and quantify  $\beta$ -AOB  
121 and to distinguish different  $\beta$ -AOB lineages. Hence, an updated set of  $\beta$ -AOB-specific FISH  
122 probes is urgently needed.

123 Here we introduce new  $\beta$ -AOB-specific rRNA-targeted oligonucleotide probes, which  
124 complement and refine the existing probe set and enable the identification, visualization, and  
125 quantification of all currently known  $\beta$ -AOB lineages. Following probe design and evaluation,  
126 the specificity and applicability of the new probes were tested with activated sludge and biofilm  
127 samples from municipal and industrial WWTPs.

## 128 **2. Materials and methods**

### 129 *2.1 In silico design of 16S rRNA-targeted probes and phylogenetic analyses*

130 The new rRNA-targeted oligonucleotide probes (Table 1) were designed using the “probe  
131 design” and “probe match” functions of the ARB software package (version 6.0.6) (Ludwig et  
132 al., 2004) and the Silva Ref\_NR99 (release 132) SSU rRNA sequence database (Quast et al.,  
133 2013). The database was amended with 46 additional full-length 16S rRNA gene sequences of  
134  $\beta$ -AOB from full-scale WWTPs in Denmark (Dueholm et al., 2019), which were retrieved from  
135 the MiDAS database (McIlroy et al., 2015; Nierychlo et al., 2019). The “probe match” tool of  
136 ARB was also used to evaluate the target group coverage and specificity of the previously  
137 published FISH probes for  $\beta$ -AOB. A maximum likelihood phylogenetic tree was calculated,  
138 based on an alignment (SINA aligner, Pruesse et al., 2012) of 505 reference sequences of  $\beta$ -

139 AOB from the aforementioned databases, using W-IQ-Tree (Trifinopoulos et al., 2016) with  
140 1,000 bootstrap iterations. TIM3e+G4 was determined by ModelFinder to be the best fitting  
141 base substitution model for the calculation (Kalyaanamoorthy et al., 2017). The resulting tree  
142 was visualized with iTOL (Letunic and Bork, 2019).

143

## 144 2.2 Cultivation and fixation of $\beta$ -AOB pure cultures

145 Pure cultures of the  $\beta$ -AOB *Nitrospira briensis* Nsp1, *Nitrospira multiformis* NI13,  
146 *Nitrosomonas europaea* Nm50, *Nitrosomonas eutropha* Nm57, *Nitrosomonas oligotropha*  
147 Nm75, and *Nitrosomonas sp.* Nm51 (an unnamed species from the *Nitrosomonas marina*  
148 lineage) were grown as described earlier (Koops et al., 1991). *Nitrosomonas communis* Nm2  
149 was grown in a modified AOB medium according to Zhou *et al.* (2019). All cultures were  
150 harvested (~40 ml) during the logarithmic growth phase and centrifuged (4,000×g, room  
151 temperature, 20 min) to collect the biomass. The supernatant was removed, and the cell pellets  
152 were resuspended in a 3% (w/v) formaldehyde solution for fixation (1 h at room temperature)  
153 as detailed elsewhere (Daims et al., 2005). The fixed cultures were washed twice in a 1× PBS  
154 (phosphate-buffered saline) solution, centrifuged 12,000×g at room temperature for 8 min, and  
155 then resuspended in a 1:1 mixture of 1× PBS and 96% (v/v) ethanol, and stored at -20°C until  
156 further processing (Daims et al., 2005).

157

## 158 2.3 Sampling and fixation of activated sludge

159 Activated sludge samples taken at several WWTPs in Austria, Germany, and Denmark were  
160 analyzed (Table 2). The samples were centrifuged (20,817×g, 4 °C, 15 min), the supernatant  
161 was removed, and the sludge was resuspended in a 2% (v/v) formaldehyde solution for fixation

162 (3 h, 4 °C). The sludge samples were subsequently washed twice in 1× PBS, resuspended in a  
163 1:1 mixture of 1× PBS and 96% (v/v) ethanol, and stored at -20°C until further processing.

164

#### 165 *2.4 Recombinant 16S rRNA expression for Clone-FISH*

166 We could not obtain cells of the isolates *Nitrosomonas cryotolerans* (targeted by the new probe  
167 Nm\_CR\_998) and *Nitrosomonas sp.* Nm143 (targeted by probe Nm\_143\_1010) (Table 1).  
168 Furthermore, no isolate is available from a *Nitrosomonas communis*-related cluster detected in  
169 some WWTPs in Denmark (Table 2), for which we designed the new probe Nm\_NI\_1026  
170 (Table 1). In order to evaluate the new probes that are specific for these  $\beta$ -AOB and their close  
171 relatives, the respective 16S rRNA was heterologously expressed in *E. coli* for Clone-FISH  
172 (Schramm et al., 2002). Briefly, synthetic Strings DNA fragments (ThermoFisher Scientific)  
173 of full-length 16S rRNA genes were cloned into *E. coli* NovaBlue competent cells using the  
174 Novagen pETBlue-1 Perfectly Blunt Cloning Kit (Merck KGaA). The *E. coli* cells were grown  
175 to an OD of 0.3-0.4, 1 mM of IPTG was added to the cultures, and the cells were incubated  
176 (1 h, 200 r.p.m., 37 °C). Subsequently, chloramphenicol (170 mg l<sup>-1</sup>) was added and the cells  
177 were incubated at 4 °C for 4 hours. Finally, the cells were fixed in formaldehyde as described  
178 above for the  $\beta$ -AOB isolates.

179

#### 180 *2.5 Fluorescence in situ hybridization, microscopy, and digital image analysis*

181 FISH of all  $\beta$ -AOB pure cultures, *E. coli* cells containing recombinant 16S rRNA (Clone-  
182 FISH), and activated sludge samples was performed according to the standard protocol for  
183 FISH with rRNA-targeted oligonucleotide probes (Table 1) (Daims et al., 2005; Manz et al.,  
184 1992). Briefly, probe solutions had a concentration of 5 pmol  $\mu$ l<sup>-1</sup> and were applied at a ratio  
185 of 1:10 (v/v) in hybridization buffer. If applicable, unlabeled competitor oligonucleotides



186 (Table 1) were used in equimolar concentrations as the probes. Hybridizations were performed  
187 at 46 °C for 2 hours. After hybridization, samples were washed in washing buffer for 10 min  
188 at 48 °C and shortly dipped into ice-cold MilliQ water. All hybridized samples were also  
189 stained with DAPI (4',6-diamidino-2-phenylindole). For this purpose, 10 µl of 10 mg/ml DAPI  
190 was spotted onto hybridized samples, incubated for 5 min at room temperature, and  
191 subsequently washed away by dipping samples in 96% (v/v) ethanol. Samples were analysed  
192 immediately or stored at -20°C.

193 Fluorescence micrographs of probe-labelled cells were acquired using an inverted Leica TCS  
194 SP8X confocal laser scanning microscope (CLSM). The CLSM was equipped with a UV 405  
195 diode and a supercontinuum white light laser, two photomultiplier (PMT) detectors, three  
196 hybrid (HyD) detectors, and the Leica Application Suite AF 3.2.1.9702 or Leica Application  
197 Suite X 3.5.6.21594. The settings for excitation and emission wavelengths were adjusted to  
198 match the respective fluorochromes (Table 1) as described elsewhere for multicolor FISH  
199 (Lukumbuzya et al., 2019). The digital image analysis and visualization software *daime*  
200 (version 2.2) (Daims et al., 2006) was used to project 3D confocal *z*-stacks.

201 To evaluate probe dissociation profiles,  $\beta$ -AOB pure cultures or *E. coli* cells (for Clone-FISH)  
202 were hybridized to the respective probes with increasing concentrations of formamide [0 to  
203 70% (v/v)] in the hybridization buffer and corresponding salt concentrations in the wash buffer  
204 (Manz et al., 1992). If applicable, competitor oligonucleotides (Table 1) were included. Images  
205 for inferring probe dissociation profiles were recorded using the same CLSM settings for all  
206 parameters (laser power, confocal pinhole size, and “smart gain”). The probe dissociation  
207 profiles were determined, based on the mean fluorescence intensities of the probe-labelled  
208 cells, by using the respective tool of the *daime* software. The data were plotted in R, and  
209 approximated probe dissociation curves were obtained by non-linear regression with a  
210 sigmoidal model.

211 For the quantification of relative biovolume fractions, activated sludge samples were  
212 hybridized to a  $\beta$ -AOB specific probe mix and to the EUB338 I-III probe mix (Table 1), both  
213 labeled with different fluorochromes (Daims and Wagner, 2007). The two  $\beta$ -AOB-specific  
214 probe mixtures used consisted of previously published or newly designed probes, respectively  
215 (Table 1). In the “old”  $\beta$ -AOB probe mix, all probes were labelled with Cy3, and their  
216 fluorescence signals were recorded together in the same image. In the “new”  $\beta$ -AOB probe  
217 mix, the probes were labelled individually with different dyes, and the recorded images of these  
218 fluorescence signals were merged *in silico* for quantifying the relative biovolume fractions of  
219  $\beta$ -AOB. Ten to 40 pairs of images containing the specific probe or EUB338 I-III probe signals,  
220 respectively, were acquired at random positions in a sample (Daims and Wagner, 2007). The  
221 CLSM settings were adjusted so that cells in the specific probe images had the same size as  
222 their counterparts in the EUB338 I-III images (Daims et al., 2005). The respective tool of the  
223 *daimo* software was used to measure the biovolume fractions of  $\beta$ -AOB based on these image  
224 pairs.

225

### 226 **3. Results and Discussion**

#### 227 *3.1 Evaluation of existing FISH probes targeting $\beta$ -AOB*

228 Most previous studies using FISH to detect  $\beta$ -AOB *in situ* relied on a set of 16S rRNA-targeted  
229 oligonucleotide probes, which were designed as long as 16 to 25 years ago. This set consists  
230 of the probe Nsm156 (for various *Nitrosomonas* spp.), NEU (for halophilic and halotolerant  
231 *Nitrosomonas* spp.), Cl6a192 (for the *Nitrosomonas oligotropha* lineage), NmV (for *N.*  
232 *mobilis*), Ncom1025 (for *Nitrosomonas communis*), Nsv443 (for the *Nitrosospira* lineage), and  
233 the two broad-range probes Nso190 and Nso1225 (for most  $\beta$ -AOB) (Adamczyk et al., 2003;  
234 Juretschko, 2000; Juretschko et al., 1998; Mobarry et al., 1996; Wagner et al., 1995). In the

235 present study, we matched the sequences of these probes against a recent 16S rRNA gene  
236 sequence database that contained 505 non-redundant, full-length sequences from cultured and  
237 uncultured  $\beta$ -AOB. This *in silico* analysis revealed considerable gaps in the target group  
238 coverage for some of the probes, whereas others still showed a surprisingly good coverage  
239 (Table 3). In particular, the broad-range probe Nso1225 still covers the vast majority of  $\beta$ -  
240 AOB, whereas probe Nso190 (originally also designed to target all  $\beta$ -AOB) has a highly  
241 incomplete coverage according to current databases. Probe Nsm156, which should target the  
242 genus *Nitrosomonas* (Mobarry et al., 1996), still covers a large fraction of this genus. Probe  
243 Cl6a192 for the *N. oligotropha* lineage (cluster 6a) covers only ~50% of its target group  
244 (Table 3). Furthermore, unexpected hybridization patterns had previously been observed for  
245 the probes Cl6a192, NEU, and Ncom1025: although these probes target different lineages of  
246  $\beta$ -AOB, a large proportion of their signals overlapped in FISH experiments with activated  
247 sludge (Gruber-Dorninger et al., 2015). These observations are consistent with a lack of  
248 specificity of probes NEU and Ncom1025, which becomes apparent when non-target  $\beta$ -AOB-  
249 sequences with 1-2 weak nucleotide mismatches to the probes are taken into account (Table 3).  
250 Such weak mismatches are often difficult to discriminate in FISH without competitor  
251 oligonucleotides. In this case, probe NEU potentially covers ~30% of cluster 6a (the target  
252 group of probe Cl6a192) and would probably also bind to members of the *N. mobilis* lineage  
253 within cluster 7. Notably, this unspecific hybridization of probe NEU would not be prevented  
254 by the published competitor (Table 1). Probe Ncom1025 would also potentially detect the  
255 majority of the *N. mobilis* lineage and could thus bind to the same organisms as probe NEU  
256 (Table 3). In our study, unspecific probe hybridization was confirmed in tests using biofilm  
257 and activated sludge samples from two bioreactors, SBBR1 and KNB (Fig. 1A, C; Table 2).  
258 Moreover, in one additional sludge from an industrial WWTP (CP Kelco, Table 2), the probe  
259 mix consisting of previously published AOB probes (Table 1) detected numerous microbial

260 cells that were arranged as tetrads within loose aggregates (Fig. 2A). The morphology of these  
261 organisms was very dissimilar from the usual size and shape of the  $\beta$ -AOB cells and cell  
262 clusters, which were also present in this sludge (Fig. 2A). Moreover, a test hybridization  
263 revealed that the tetrad-shaped cells were also labelled by probe Gam42a (data not shown),  
264 suggesting that these organisms were Gammaproteobacteria and unspecifically labelled by the  
265 previously published AOB probes. In summary, the *in silico* evaluation and test hybridizations  
266 demonstrated that several of the previously published FISH probes for  $\beta$ -AOB suffer from an  
267 insufficient target group coverage and specificity. As a consequence, further use of the affected  
268 probes for the *in situ* identification and quantification of the respective  $\beta$ -AOB groups should  
269 be performed with caution by taking into account their actual specificities (Table 3).

270

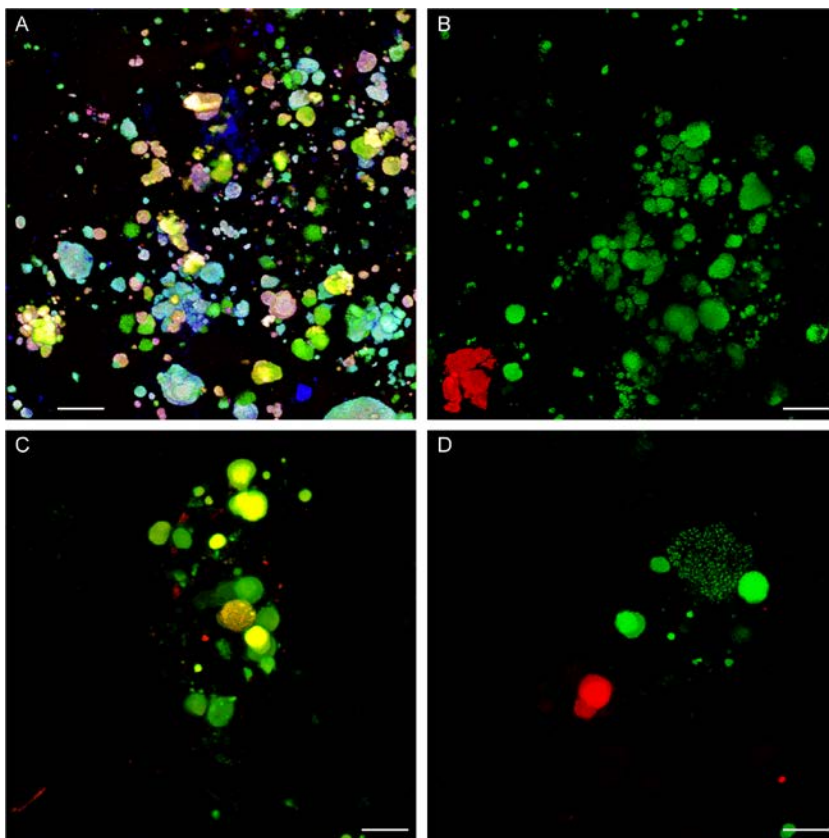

271

272 **Figure 1.** Comparison of hybridization patterns of selected previously published and newly  
273 designed FISH probes targeting  $\beta$ -AOB. (A) FISH of biofilm from reactor SBBR1 with probes

274 NEU (red), Cl6a192 (green), and Ncom1025 (blue). Mixed colors (cyan, magenta, yellow,  
275 white) indicate binding of multiple probes to the same microcolonies of  $\beta$ -AOB. **(B)** Sample  
276 of the same biofilm as in panel A after FISH with probes Nm\_EU\_136 (red) and Nm\_OL\_703  
277 (green). No cross-hybridization was observed. Probe Nm\_CO\_1457 targeting the same lineage  
278 as probe Ncom1025 was also applied, but no signals were recorded, indicating that probe  
279 Ncom1025 (panel A) detected non-target  $\beta$ -AOB in this sample. **(C)** FISH of sludge from  
280 WWTP KNB with probes NEU (red) and Cl6a192 (green). Yellow indicates binding of both  
281 probes to the same microcolonies of  $\beta$ -AOB. **(D)** Sample of the same sludge as in panel C after  
282 FISH with probes Nm\_EU\_136 (red) and Nm\_OL\_703 (green). No cross-hybridization was  
283 observed. **(A-D)** All panels show projections of 3D confocal z-stacks. Bar = 20  $\mu$ m.

284

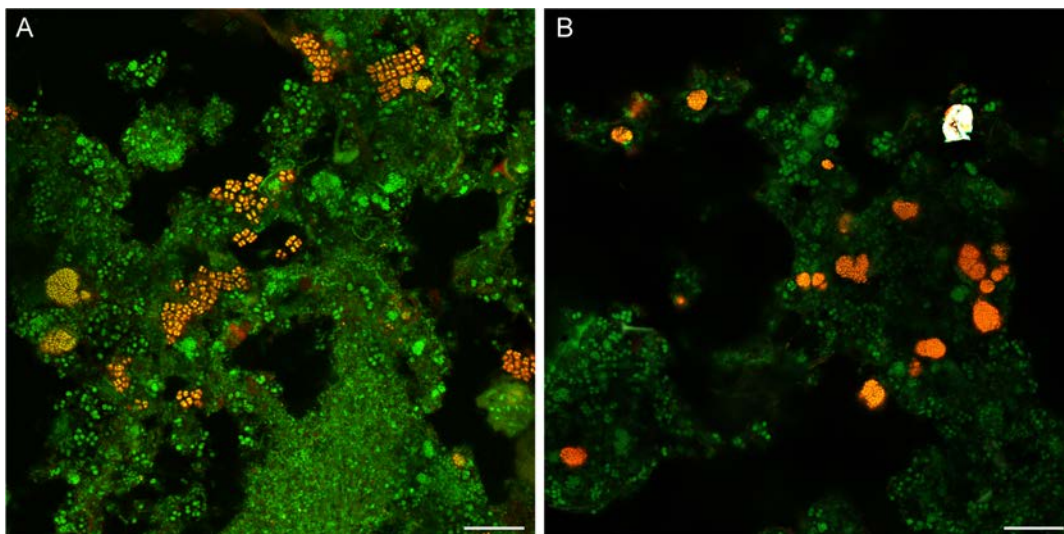

285

286 **Figure 2.** Detection of  $\beta$ -AOB in sludge from the WWTP CP Kelco using previously published  
287 and newly designed AOB probe mixtures. **(A)** Application of the old AOB probe mix (red) and  
288 probes EUB338 I-III (green). Orange indicates binding of the AOB- and EUB338-probes to  
289 the same cells. Note the detection of numerous tetrad-shaped cells by the old AOB mix and the  
290 EUB338 probes. **(B)** Application of the new AOB probe mix (red) and probes EUB338 I-III

291 (green). The white object in the upper right corner is an artifact. (A, B) Bar = 20  $\mu$ m. Details  
292 of the probe mixtures are provided in Table 1.

293

### 294 3.2 Design of a refined, $\beta$ -AOB cluster-specific 16S rRNA-targeted oligonucleotide probe set

295 Based on 16S rRNA and *amoA* gene phylogenies, a subdivision of the  $\beta$ -AOB into distinct  
296 lineages (“clusters”) was suggested previously (Koops et al., 2003; Purkhold et al., 2003, 2000;  
297 Stephen et al., 1996). In that phylogenetic framework, members of the genus *Nitrosospira*  
298 belong to the clusters 0 to 4, whereas the remaining clusters 5 to 8 are formed by different  
299 lineages of the genus *Nitrosomonas* (Purkhold et al., 2000). Two additional, separate lineages  
300 were formed by *Nitrosomonas cryotolerans* and the estuary isolate *Nitrosomonas* sp. Nm143  
301 (Purkhold et al., 2003, 2000). Notably, the obtained tree topologies did not support a clear  
302 separation of the *Nitrosospira* and *Nitrosomonas* genera; instead, the analyses indicated that  
303 the currently defined genus *Nitrosomonas* is not monophyletic within the  $\beta$ -AOB (Purkhold et  
304 al., 2003, 2000). Since the individual *Nitrosomonas* clusters nevertheless represent stable  
305 lineages in bootstrap analyses (Purkhold et al., 2003), and a thorough phylogenetic and  
306 taxonomic reevaluation of the  $\beta$ -AOB is still pending, we retain the established nomenclature  
307 in this study.

308 Using the  $\beta$ -AOB clusters as a framework we designed six new, 16S rRNA-targeted  
309 oligonucleotide probes that are specific for *Nitrosomonas* cluster 6 (including both 6a with *N.*  
310 *oligotropha* and *N. ureae*, and 6b with *N. marina* and *N. aestuarii*), cluster 7 (with *N. europaea*,  
311 *N. eutropha*, and *N. mobilis*), cluster 8 (with *N. communis* and *N. nitrosa*), the *N. cryotolerans*  
312 cluster, the *N. sp. Nm143* cluster, and a new environmental cluster “DK-WWTP” related to  
313 cluster 8 (Fig. 3). In addition, the old probe Nsv443, which offered good coverage of the target  
314 clade but unsatisfactory target specificity, was replaced with the new probe Nsp441 for the

315 genus *Nitrospira* (comprising clusters 0-4) (Fig. 3). For most of the new probes, we designed  
316 competitor oligonucleotides that help discriminate non-target organisms which possess only  
317 one or few weak base mismatches to the probe sequence in their 16S rRNA. These competitors  
318 were used as unlabeled oligonucleotides and in equimolar concentrations as the labeled probes,  
319 in FISH experiments. Details of the probes, their target groups, and the competitors are listed  
320 in Table 1. According to an *in silico* analysis, the new probes in combination with the  
321 designated competitors (Table 1) display a very good coverage and specificity for their target  
322  $\beta$ -AOB clusters, including cultured isolates as well as environmental sequences from  
323 uncultured  $\beta$ -AOB (Table 3). Notably, the newly designed probes (with competitors) also  
324 display a very high specificity with respect to non-target matches outside of the  $\beta$ -AOB (*in*  
325 *silico* evaluation based on the SILVA SSU NR release 138 and the ARB “probe match” tool  
326 with 0-2 weighted mismatches as search criterion). Merely for probe Nm\_143\_1010, less than  
327 ten non-target betaproteobacterial sequences were found that are not covered by the competitor  
328 for this probe (Table 1), and probe Nsp441 (Table 1) might hybridize with less than 60 non-  
329 target betaproteobacteria (mainly from the genera *Hydrogenophaga* and *Gallionella*).  
330 However, the number for Nsp441 is low compared to the previously published probe Nsv443  
331 that would potentially detect more than 500 non-target organisms. Considering that any  
332 environmental sample likely contains non-target organisms, which are not present in the current  
333 sequence databases, we recommend to use the newly designed  $\beta$ -AOB cluster-specific probes  
334 in combination with the broad-range probe Nso1225 (Table 3) labelled with a different  
335 fluorochrome. Cells detected by both probes should represent the targeted  $\beta$ -AOB lineage. In  
336 order to identify the optimal hybridization stringency for each probe, the dissociation profiles  
337 of the probes were determined by performing FISH at increasing hybridization and washing  
338 stringencies (Manz et al., 1992). Where possible, pure culture cells of the target  $\beta$ -AOB were  
339 used in these experiments. As isolates of *N. cryotolerans*, *N. sp.* Nm143, and the uncultured

340 cluster DK-WWTP were not available, their 16S rRNA genes were heterologously expressed  
341 in *E. coli* (Schramm et al., 2002) to determine the dissociation profiles of the respective probes.  
342 For all probes, we obtained sigmoid dissociation profiles that were suitable to identify the  
343 highest stringency, which still yields bright fluorescence signals with the target organisms  
344 (Fig. S1 and S2, Table 1).

345 All probes were also hybridized to non-target  $\beta$ -AOB cells (or the respective recombinant *E.*  
346 *coli* cells) to test for unspecific hybridization. In these experiments, no fluorescence signal was  
347 observed for any probe at the optimal stringency and in the presence of the competitor  
348 oligonucleotides (data not shown).

349

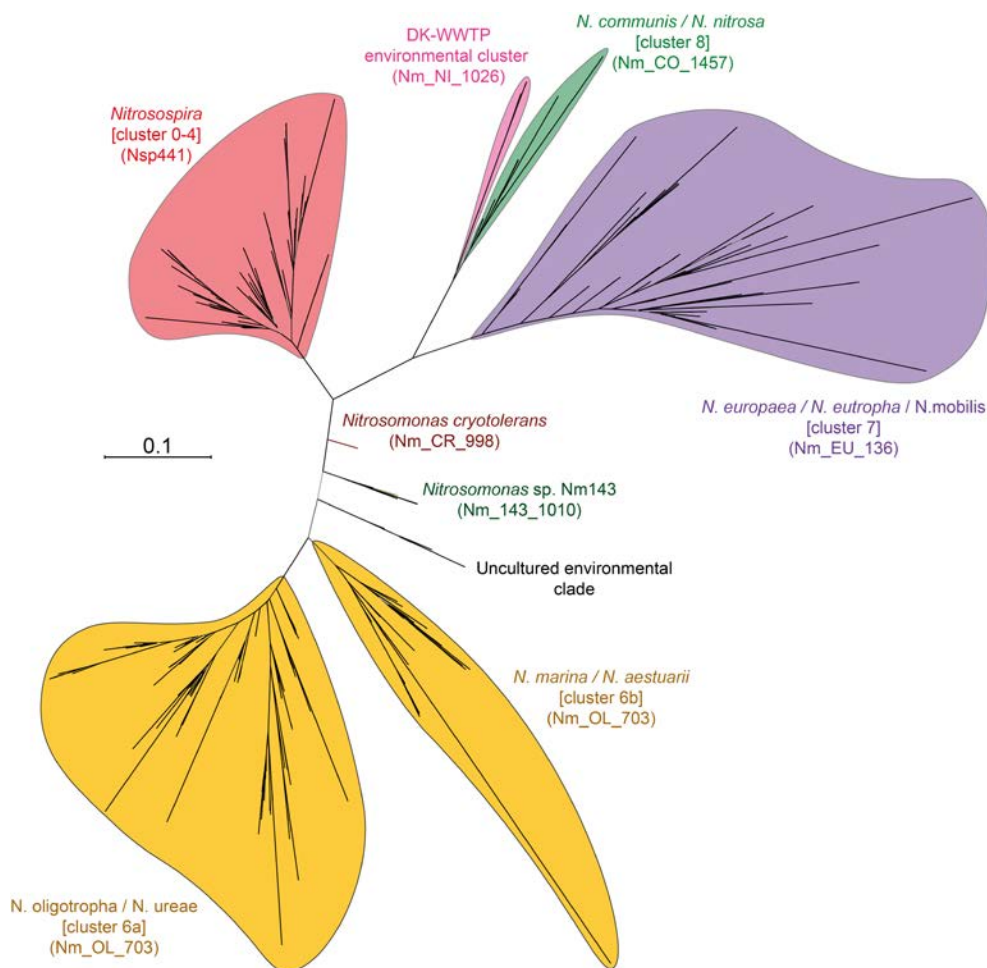

350



351 **Figure 3.** Unrooted maximum likelihood tree showing the major  $\beta$ -AOB lineages. Cluster  
352 designations, according to Purkhold *et al.* (2000), are indicated in brackets. The names of newly  
353 designed 16S rRNA-targeted oligonucleotide probes are indicated in parentheses. The scale  
354 bar depicts 0.1 estimated substitutions per nucleotide.

355

### 356 3.3 Detection and quantification of $\beta$ -AOB in activated sludge

357 The applicability of the new probe set was tested in FISH experiments with nitrifying activated  
358 sludge samples from different WWTPs in Austria, Germany, and Denmark (Table 2). In  
359 particular, the newly designed probes targeting *Nitrosomonas* cluster 6 (Nm\_OL\_703) and  
360 cluster 7 (Nm\_EU\_136) were applied to the same sludge samples that we had already used to  
361 confirm the cross-hybridization of the previously published probes Cl6a192, NEU, and  
362 Ncom1025 (Fig. 1). With the two new probes, no overlapping fluorescence signals were  
363 observed, and the hybridization patterns appeared to be completely consistent (Fig. 1B, D).  
364 This result is in agreement with the *in silico* analysis, which predicted that probes Nm\_OL\_703  
365 and Nm\_EU\_136 do not target the same sequences in the database (Table 3). Furthermore,  
366 when the “new AOB probe mix” (Table 1) was used to detect  $\beta$ -AOB in the sludge from CP  
367 Kelco, the conspicuous tetrad-shaped cells, detected by the “old AOB probe mix” were not  
368 labelled anymore. Instead, the “new probe mix” detected exclusively cells and cell clusters that  
369 displayed the typical morphology of  $\beta$ -AOB, which has been observed in numerous studies of  
370 nitrifiers in WWTPs and isolated  $\beta$ -AOB (Daims *et al.*, 2001; e.g., Juretschko *et al.*, 1998;  
371 Koops and Pommerening-Röser, 2001) (Fig. 2B). The new probe Nm\_NI\_1026, which targets  
372 the novel uncultured lineage DK-WWTP (Fig. 3), was applied to activated sludge from WWTP  
373 Esbjerg East where it showed specific signals with a morphology similar to that typically  
374 portrayed by  $\beta$ -AOB (Fig. 4). We could not test the new probes Nm\_CR\_998, Nm\_143\_1010,

375 Nm\_CO\_1457, and Nsp441 with environmental samples, because samples that contained their  
376 target  $\beta$ -AOB and were suitable for FISH were not available in the course of this study.  
377 However, these probes were successfully evaluated using pure  $\beta$ -AOB cultures or Clone-FISH.  
378 Under the assumption that those probes, which could only be tested by Clone-FISH, will also  
379 bind to the native ribosomes of their target organisms, all probes should be suitable for FISH  
380 analyses of environmental AOB communities.

381

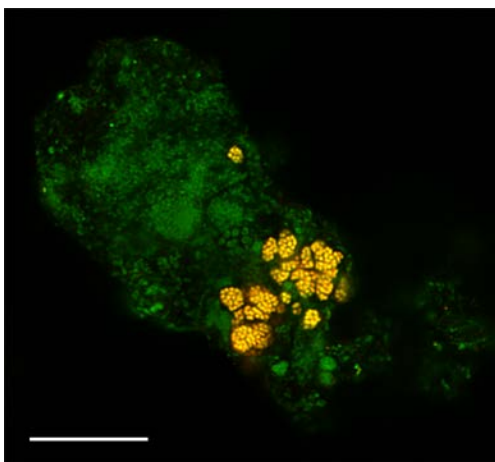

382

383 **Figure 4.** Detection of the novel *Nitrosomonas* lineage DK-WWTP in activated sludge from  
384 the WWTP Esbjerg East. Applied probes were EUB338 I-III (green) and NM\_NI\_1026 (red).  
385 Yellow indicates binding of NM\_NI\_1026 and the EUB338-probes to the same cells. Bar =  
386 20  $\mu$ m.

387

388 A quantitative comparison of the “old” and “new” AOB probe mixes (Table 1) was carried out  
389 with activated sludge samples from seven WWTPs (Table 4). For six of these sludge samples,  
390 highly similar biovolume fractions of  $\beta$ -AOB were measured by quantitative FISH with either  
391 probe set (Table 4). Only for the CP Kelco sludge we obtained a much lower biovolume  
392 fraction of  $\beta$ -AOB with the newly designed probe set than with the previously published probes

393 (Table 4). This difference is most likely explained by the better specificity of the newly  
394 designed probes, which did not stain the abundant tetrad-shaped cells in this sludge (Fig. 2).  
395 For all samples and experiments, high “congruency” values >90% were obtained (Table 4).  
396 This value indicates that the fluorescence signals in the  $\beta$ -AOB probe mix images occupied  
397 almost exactly the same area as their counterparts in the general bacterial probe (EUB338 I-  
398 III) images. Thus, the  $\beta$ -AOB probes did not detect large amounts of non-bacterial cells and  
399 did not bind excessively to non-microbial particles in the samples. Our results confirm that the  
400 new  $\beta$ -AOB probe mix (Table 1) is suitable to detect and quantify  $\beta$ -AOB in WWTPs, and,  
401 importantly, the data for CP Kelco show that the new mix also offers a better specificity for  $\beta$ -  
402 AOB than the previously published probes.

403

#### 404 **4. Conclusion**

405 The newly designed 16S rRNA-targeted oligonucleotide probes offer a similar or better  
406 coverage of different  $\beta$ -AOB lineages than the established probes (Table 3), and they do not  
407 show the unspecific hybridization patterns that were observed for some of the previously  
408 designed probes when applied to complex microbial communities (Fig. 1 and 2). However,  
409 they are not designed to completely replace the established FISH probes for  $\beta$ -AOB. For  
410 example, probes Nso1225 and Nsm156 still offer an excellent coverage of their target groups  
411 (Table 3), which is why no new broad-range probe for  $\beta$ -AOB was designed in this study.  
412 Instead, the new probes can be applied in combination with selected previously published  
413 probes to achieve the currently best possible total coverage of  $\beta$ -AOB and to identify specific  
414  $\beta$ -AOB lineages with a high confidence by FISH. Hence, the new probe set will facilitate future  
415 studies of  $\beta$ -AOB community composition and population dynamics. It will also enable  
416 specific analyses of the spatial localization of members of the different  $\beta$ -AOB lineages in flocs

417 and biofilms. Such spatial analyses can reveal potential niche differentiation and symbiotic  
418 interactions with other microorganisms, but were previously hampered by unspecific  
419 hybridization patterns of some of the old probes. Although we used only activated sludge and  
420 biofilm samples from WWTPs to test the probes in this study, the new probe set can likely also  
421 be applied to other types of samples that are suitable for rRNA-targeted FISH. In summary, the  
422 new probes will improve virtually all spatial and functional analyses of  $\beta$ -AOB that use FISH  
423 to gain insights which can only be obtained by *in situ* approaches.

424

#### 425 **Declaration of competing interest**

426 The authors declare that they have no known competing financial interests or personal  
427 relationships that could have appeared to influence the work reported in this paper.

428

#### 429 **Acknowledgements**

430 This research was supported by the Austrian Science Fund (FWF) via project P27319-B21 to  
431 H.D. and W1257 to H.D. and M.W., the Comammox Research Platform of the University of  
432 Vienna, the Max Planck Society, and the Danish Research Foundation (grant 6111-00617A to  
433 P.H.N.).

434

#### 435 **References**

436 Adamczyk, J., Hesselsoe, M., Iversen, N., Horn, M., Lehner, A., Nielsen, P.H., Schloter, M.,  
437 Roslev, P., Wagner, M., 2003. The isotope array, a new tool that employs substrate-

- 438 mediated labeling of rRNA for determination of microbial community structure and  
439 function. *Appl. Environ. Microbiol.* 69, 6875–6887.
- 440 Almstrand, R., Daims, H., Persson, F., Sorensson, F., Hermansson, M., 2013. New methods  
441 for analysis of spatial distribution and coaggregation of microbial populations in  
442 complex biofilms. *Appl. Environ. Microbiol.* 79, 5978–5987.  
443 <https://doi.org/10.1128/aem.01727-13>
- 444 Amann, R.I., Binder, B.J., Olson, R.J., Chisholm, S.W., Devereux, R., Stahl, D.A., 1990.  
445 Combination of 16S rRNA-targeted oligonucleotide probes with flow cytometry for  
446 analyzing mixed microbial populations. *Appl. Environ. Microbiol.* 56, 1919–1925.
- 447 Amann, R.I., Ludwig, W., Schleifer, K.-H., 1995. Phylogenetic identification and in situ  
448 detection of individual microbial cells without cultivation. *Microbiol. Rev.* 59, 143–  
449 169.
- 450 Baptista, J.D.C., Lunn, M., Davenport, R.J., Swan, D.L., Read, L.F., Brown, M.R., Morais, C.,  
451 Curtis, T.P., 2014. Agreement between *amoA* gene-specific quantitative PCR and  
452 fluorescence *in situ* hybridization in the measurement of ammonia-oxidizing bacteria  
453 in activated sludge. *Appl. Environ. Microbiol.* 80, 5901–5910.  
454 <https://doi.org/10.1128/AEM.01383-14>
- 455 Berry, D., Stecher, B., Schintlmeister, A., Reichert, J., Brugiroux, S., Wild, B., Wanek, W.,  
456 Richter, A., Rauch, I., Decker, T., Loy, A., Wagner, M., 2013. Host-compound foraging  
457 by intestinal microbiota revealed by single-cell stable isotope probing. *Proc. Natl.*  
458 *Acad. Sci. U.S.A.* 110, 4720–4725. <https://doi.org/10.1073/pnas.1219247110>
- 459 Bock, E., Wagner, M., 2001. Oxidation of inorganic nitrogen compounds as an energy source,  
460 in: Dworkin, M., Falkow, S., Rosenberg, E., Schleifer, K.H., Stackebrandt, E. (Eds.),  
461 *The Prokaryotes: A Handbook on the Biology of Bacteria.* Springer Science+Business  
462 Media, New York, pp. 457–495.

- 463 Bollmann, A., Bullerjahn, G.S., McKay, R.M., 2014. Abundance and diversity of ammonia-  
464 oxidizing archaea and bacteria in sediments of trophic end members of the Laurentian  
465 Great Lakes, Erie and Superior. PLOS ONE 9, e97068.  
466 <https://doi.org/10.1371/journal.pone.0097068>
- 467 Campbell, M.A., Chain, P.S.G., Dang, H., Sheikh, A.F.E., Norton, J.M., Ward, N.L., Ward,  
468 B.B., Klotz, M.G., 2011. *Nitrosococcus watsonii* sp. nov., a new species of marine  
469 obligate ammonia-oxidizing bacteria that is not omnipresent in the world's oceans: calls  
470 to validate the names '*Nitrosococcus halophilus*' and '*Nitrosomonas mobilis*.' FEMS  
471 Microbiol. Ecol. 76, 39–48. <https://doi.org/10.1111/j.1574-6941.2010.01027.x>
- 472 Daims, H., Brühl, A., Amann, R., Schleifer, K.-H., Wagner, M., 1999. The domain-specific  
473 probe EUB338 is insufficient for the detection of all *Bacteria*: Development and  
474 evaluation of a more comprehensive probe set. Syst. Appl. Microbiol. 22, 434–444.
- 475 Daims, H., Lebedeva, E.V., Pjevac, P., Han, P., Herbold, C., Albertsen, M., Jehmlich, N.,  
476 Palatinszky, M., Vierheilig, J., Bulaev, A., Kirkegaard, R.H., von Bergen, M., Rattei,  
477 T., Bendinger, B., Nielsen, P.H., Wagner, M., 2015. Complete nitrification by  
478 *Nitrospira* bacteria. Nature 528, 504–509. <https://doi.org/10.1038/nature16461>
- 479 Daims, H., Lücker, S., Wagner, M., 2016. A new perspective on microbes formerly known as  
480 nitrite-oxidizing bacteria. Trends Microbiol. 24, 699–712.  
481 <https://doi.org/10.1016/j.tim.2016.05.004>
- 482 Daims, H., Lücker, S., Wagner, M., 2006. *daime*, a novel image analysis program for microbial  
483 ecology and biofilm research. Env. Microbiol. 8, 200–213.
- 484 Daims, H., Nielsen, J.L., Nielsen, P.H., Schleifer, K.H., Wagner, M., 2001. In situ  
485 characterization of *Nitrospira*-like nitrite-oxidizing bacteria active in wastewater  
486 treatment plants. Appl. Environ. Microbiol. 67, 5273–5284.

- 487 Daims, H., Stoecker, K., Wagner, M., 2005. Fluorescence *in situ* hybridisation for the detection  
488 of prokaryotes, in: Osborn, A.M., Smith, C.J. (Eds.), Molecular Microbial Ecology.  
489 Bios-Garland, Abingdon, U.K., pp. 213–239.
- 490 Daims, H., Wagner, M., 2007. Quantification of uncultured microorganisms by fluorescence  
491 microscopy and digital image analysis. Appl. Microbiol. Biotechnol. 75, 237–248.  
492 <https://doi.org/10.1007/s00253-007-0886-z>
- 493 DeLong, E.F., Wickham, G.S., Pace, N.R., 1989. Phylogenetic stains: ribosomal RNA based  
494 probes for the identification of single cells. Science 243, 1360–1363.
- 495 Di, H.J., Cameron, K.C., Shen, J.-P., Winefield, C.S., O’Callaghan, M., Bowatte, S., He, J.-Z.,  
496 2010. Ammonia-oxidizing bacteria and archaea grow under contrasting soil nitrogen  
497 conditions. FEMS Microbiol. Ecol. 72, 386–394. [https://doi.org/10.1111/j.1574-](https://doi.org/10.1111/j.1574-6941.2010.00861.x)  
498 [6941.2010.00861.x](https://doi.org/10.1111/j.1574-6941.2010.00861.x)
- 499 Dolinšek, J., Lagkouvardos, I., Wanek, W., Wagner, M., Daims, H., 2013. Interactions of  
500 nitrifying bacteria and heterotrophs: Identification of a *Micavibrio*-like, putative  
501 predator of *Nitrospira*. Appl. Env. Microbiol. 79, 2027–2037.  
502 <https://doi.org/10.1128/AEM.03408-12>
- 503 Dueholm, M.S., Andersen, K.S., Petriglieri, F., McIlroy, S.J., Nierychlo, M., Petersen, J.F.,  
504 Kristensen, J.M., Yashiro, E., Karst, S.M., Albertsen, M., Nielsen, P.H., 2019.  
505 Comprehensive ecosystem-specific 16S rRNA gene databases with automated  
506 taxonomy assignment (AutoTax) provide species-level resolution in microbial ecology.  
507 bioRxiv 672873. <https://doi.org/10.1101/672873>
- 508 Fan, F., Yang, Q., Li, Z., Wei, D., Cui, X., Liang, Y., 2011. Impacts of organic and inorganic  
509 fertilizers on nitrification in a cold climate soil are linked to the bacterial ammonia  
510 oxidizer community. Microb. Ecol. 62, 982–990. [https://doi.org/10.1007/s00248-011-](https://doi.org/10.1007/s00248-011-9897-5)  
511 [9897-5](https://doi.org/10.1007/s00248-011-9897-5)

- 512 Fernando, E.Y., McIlroy, S.J., Nierychlo, M., Herbst, F.-A., Petriglieri, F., Schmid, M.C.,  
513 Wagner, M., Nielsen, J.L., Nielsen, P.H., 2019. Resolving the individual contribution  
514 of key microbial populations to enhanced biological phosphorus removal with Raman-  
515 FISH. *ISME J.* 13, 1933–1946. <https://doi.org/10.1038/s41396-019-0399-7>
- 516 Fujitani, H., Kumagai, A., Ushiki, N., Momiuchi, K., Tsuneda, S., 2015. Selective isolation of  
517 ammonia-oxidizing bacteria from autotrophic nitrifying granules by applying cell-  
518 sorting and sub-culturing of microcolonies. *Front. Microbiol.* 6.  
519 <https://doi.org/10.3389/fmicb.2015.01159>
- 520 Gao, J.-F., Luo, X., Wu, G.-X., Li, T., Peng, Y.-Z., 2013. Quantitative analyses of the  
521 composition and abundance of ammonia-oxidizing archaea and ammonia-oxidizing  
522 bacteria in eight full-scale biological wastewater treatment plants. *Bioresour. Technol.*  
523 138, 285–296. <https://doi.org/10.1016/j.biortech.2013.03.176>
- 524 Gruber-Dorninger, C., Pester, M., Kitzinger, K., Savio, D.F., Loy, A., Rattei, T., Wagner, M.,  
525 Daims, H., 2015. Functionally relevant diversity of closely related *Nitrospira* in  
526 activated sludge. *ISME J.* 9, 643–655.
- 527 Gwak, J.-H., Jung, M.-Y., Hong, H., Kim, J.-G., Quan, Z.-X., Reinfelder, J.R., Spasov, E.,  
528 Neufeld, J.D., Wagner, M., Rhee, S.-K., 2019. Archaeal nitrification is constrained by  
529 copper complexation with organic matter in municipal wastewater treatment plants.  
530 *ISME J.* 1–12. <https://doi.org/10.1038/s41396-019-0538-1>
- 531 Hatzenpichler, R., Scheller, S., Tavormina, P.L., Babin, B.M., Tirrell, D.A., Orphan, V.J.,  
532 2014. *In situ* visualization of newly synthesized proteins in environmental microbes  
533 using amino acid tagging and click chemistry. *Env. Microbiol.* 16, 2568–2590.  
534 <https://doi.org/10.1111/1462-2920.12436>
- 535 Hayatsu, M., Tago, K., Uchiyama, I., Toyoda, A., Wang, Y., Shimomura, Y., Okubo, T.,  
536 Kurisu, F., Hirono, Y., Nonaka, K., Akiyama, H., Itoh, T., Takami, H., 2017. An acid-



- 537 tolerant ammonia-oxidizing gamma-proteobacterium from soil. ISME J. 11, 1130–  
538 1141. <https://doi.org/10.1038/ismej.2016.191>
- 539 Huang, W.E., Stoecker, K., Griffiths, R., Newbold, L., Daims, H., Whiteley, A.S., Wagner, M.,  
540 2007. Raman-FISH: combining stable-isotope Raman spectroscopy and fluorescence  
541 *in situ* hybridization for the single cell analysis of identity and function. Env. Microbiol.  
542 9, 1878–1889.
- 543 Juretschko, S., 2000. Mikrobielle Populationsstruktur und -dynamik in einer  
544 nitrifizierenden/denitrifizierenden Belebtschlammanlage (Ph.D. thesis). Technische  
545 Universität München, München.
- 546 Juretschko, S., Loy, A., Lehner, A., Wagner, M., 2002. The microbial community composition  
547 of a nitrifying-denitrifying activated sludge from an industrial sewage treatment plant  
548 analyzed by the full-cycle rRNA approach. Syst. Appl. Microbiol. 25, 84–99.
- 549 Juretschko, S., Timmermann, G., Schmid, M., Schleifer, K.-H., Pommerening-Röser, A.,  
550 Koops, H.-P., Wagner, M., 1998. Combined molecular and conventional analyses of  
551 nitrifying bacterium diversity in activated sludge: *Nitrosococcus mobilis* and  
552 *Nitrospira*-like bacteria as dominant populations. Appl. Environ. Microbiol. 64, 3042–  
553 3051.
- 554 Kalyaanamoorthy, S., Minh, B.Q., Wong, T.K.F., von Haeseler, A., Jermini, L.S., 2017.  
555 ModelFinder: fast model selection for accurate phylogenetic estimates. Nat. Methods  
556 14, 587–589. <https://doi.org/10.1038/nmeth.4285>
- 557 Könneke, M., Bernhard, A.E., de la Torre, J.R., Walker, C.B., Waterbury, J.B., Stahl, D.A.,  
558 2005. Isolation of an autotrophic ammonia-oxidizing marine archaeon. Nature 437,  
559 543–546.
- 560 Koops, H.-P., Böttcher, B., Möller, U.C., Pommerening-Röser, A., Stehr, G., 1991. Classification  
561 of eight new species of ammonia-oxidizing bacteria: *Nitrosomonas communis* sp. nov.,

562 *Nitrosomonas ureae* sp. nov., *Nitrosomonas aestuarii* sp. nov., *Nitrosomonas marina*  
563 sp. nov., *Nitrosomonas nitrosa* sp. nov., *Nitrosomonas eutropha* sp. nov., *Nitrosomonas*  
564 *oligotropha* sp. nov., and *Nitrosomonas halophila* sp. nov. J. Gen. Microbiol. 137,  
565 1689–1699.

566 Koops, H.P., Pommerening-Röser, A., 2001. Distribution and ecophysiology of the nitrifying  
567 bacteria emphasizing cultured species. FEMS Microbiol. Ecol. 37, 1–9.

568 Koops, H.P., Purkhold, U., Pommerening-Röser, A., Timmermann, G., Wagner, M., 2003. The  
569 lithoautotrophic ammonia-oxidizing bacteria, in: Dworkin, M., Falkow, S., Rosenberg,  
570 E., Schleifer, K.H., Stackebrandt, E. (Eds.), The Prokaryotes: A Handbook on the  
571 Biology of Bacteria. Springer Science+Business Media, New York, pp. 778–811.

572 Lee, N., Nielsen, P.H., Andreasen, K.H., Juretschko, S., Nielsen, J.L., Schleifer, K.-H.,  
573 Wagner, M., 1999. Combination of fluorescent *in situ* hybridization and  
574 microautoradiography - a new tool for structure-function analyses in microbial ecology.  
575 Appl. Environ. Microbiol. 65, 1289–1297.

576 Letunic, I., Bork, P., 2019. Interactive Tree Of Life (iTOL) v4: recent updates and new  
577 developments. Nucleic Acids Res. 47, W256–W259.  
578 <https://doi.org/10.1093/nar/gkz239>

579 Ludwig, W., Strunk, O., Westram, R., Richter, L., Meier, H., Yadhu, K., Buchner, A., Lai, T.,  
580 Steppi, S., Jobb, G., Förster, W., Brettske, I., Gerber, S., Ginhart, A.W., Gross, O.,  
581 Grumann, S., Hermann, S., Jost, R., König, A., Liss T, Lüßmann, R., May, M., Nonhoff,  
582 B., Reichel, B., Strehlow, R., Stamatakis, A., Stuckmann, N., Vilbig, A., Lenke, M.,  
583 Ludwig, T., Bode, A., Schleifer, K.H., 2004. ARB: a software environment for  
584 sequence data. Nucleic Acids Res. 32, 1363–1371.

- 585 Lukumbuzya, M., Schmid, M., Pjevac, P., Daims, H., 2019. A multicolor fluorescence in situ  
586 hybridization approach using an extended set of fluorophores to visualize  
587 microorganisms. *Front. Microbiol.* 10. <https://doi.org/10.3389/fmicb.2019.01383>
- 588 Maixner, F., Noguera, D.R., Anneser, B., Stoecker, K., Wegl, G., Wagner, M., Daims, H.,  
589 2006. Nitrite concentration influences the population structure of *Nitrospira*-like  
590 bacteria. *Env. Microbiol.* 8, 1487–1495.
- 591 Manz, W., Amann, R., Ludwig, W., Wagner, M., Schleifer, K.-H., 1992. Phylogenetic  
592 oligodeoxynucleotide probes for the major subclasses of proteobacteria: problems and  
593 solutions. *Syst. Appl. Microbiol.* 15, 593–600.
- 594 McIlroy, S.J., Saunders, A.M., Albertsen, M., Nierychlo, M., McIlroy, B., Hansen, A.A., Karst,  
595 S.M., Nielsen, J.L., Nielsen, P.H., 2015. MiDAS: the field guide to the microbes of  
596 activated sludge. *Database*, bav062. <https://doi.org/10.1093/database/bav062>
- 597 Mobarry, B.K., Wagner, M., Urbain, V., Rittmann, B.E., Stahl, D.A., 1996. Phylogenetic  
598 probes for analyzing abundance and spatial organization of nitrifying bacteria. *Appl.*  
599 *Environ. Microbiol.* 62, 2156–2162.
- 600 Musat, N., Foster, R., Vagner, T., Adam, B., Kuypers, M.M.M., 2012. Detecting metabolic  
601 activities in single cells, with emphasis on nanoSIMS. *FEMS Microbiol. Rev.* 36, 486–  
602 511. <https://doi.org/10.1111/j.1574-6976.2011.00303.x>
- 603 Mußmann, M., Brito, I., Pitcher, A., Sinnighe Damste, J.S., Hatzenpichler, R., Richter, A.,  
604 Nielsen, J.L., Nielsen, P.H., Muller, A., Daims, H., Wagner, M., Head, I.M., 2011.  
605 Thaumarchaeotes abundant in refinery nitrifying sludges express *amoA* but are not  
606 obligate autotrophic ammonia oxidizers. *Proc. Natl. Acad. Sci. U.S.A.* 108, 16771–  
607 16776. <https://doi.org/10.1073/pnas.1106427108>
- 608 Nierychlo, M., Andersen, K.S., Xu, Y., Green, N., Albertsen, M., Dueholm, M.S., Nielsen,  
609 P.H., 2019. Species-level microbiome composition of activated sludge - introducing the

- 610 MiDAS 3 ecosystem-specific reference database and taxonomy. bioRxiv 842393.  
611 <https://doi.org/10.1101/842393>
- 612 Okabe, S., Satoh, H., Watanabe, Y., 1999. *In situ* analysis of nitrifying biofilms as determined  
613 by *in situ* hybridization and the use of microelectrodes. Appl. Environ. Microbiol. 65,  
614 3182–3191.
- 615 Parks, D.H., Chuvochina, M., Waite, D.W., Rinke, C., Skarshewski, A., Chaumeil, P.-A.,  
616 Hugenholtz, P., 2018. A standardized bacterial taxonomy based on genome phylogeny  
617 substantially revises the tree of life. Nat. Biotechnol. 36, 996–1004.  
618 <https://doi.org/10.1038/nbt.4229>
- 619 Parte, A.C., 2014. LPSN—list of prokaryotic names with standing in nomenclature. Nucleic  
620 Acids Res. 42, D613–D616. <https://doi.org/10.1093/nar/gkt1111>
- 621 Prosser, J.I., Head, I.M., Stein, L.Y., 2014. The family *Nitrosomonadaceae*, in: Rosenberg, E.,  
622 DeLong, E.F., Lory, S., Stackebrandt, E., Thompson, F. (Eds.), The Prokaryotes:  
623 Alphaproteobacteria and Betaproteobacteria. Springer, Berlin, Heidelberg, pp. 901–  
624 918. [https://doi.org/10.1007/978-3-642-30197-1\\_372](https://doi.org/10.1007/978-3-642-30197-1_372)
- 625 Pruesse, E., Peplies, J., Glöckner, F.O., 2012. SINA: accurate high-throughput multiple  
626 sequence alignment of ribosomal RNA genes. Bioinformatics 28, 1823–1829.  
627 <https://doi.org/10.1093/bioinformatics/bts252>
- 628 Purkhold, U., Pommering-Röser, A., Juretschko, S., Schmid, M.C., Koops, H.-P., Wagner, M.,  
629 2000. Phylogeny of all recognized species of ammonia oxidizers based on comparative  
630 16S rRNA and *amoA* sequence analysis: implications for molecular diversity surveys.  
631 Appl. Environ. Microbiol. 66, 5368–5382.
- 632 Purkhold, U., Wagner, M., Timmermann, G., Pommerening-Röser, A., Koops, H.P., 2003. 16S  
633 rRNA and *amoA*-based phylogeny of 12 novel betaproteobacterial ammonia oxidizing

- 634 isolates: extension of the data set and proposal of a new lineage within the  
635 Nitrosomonads. *Int. J. Syst. Evol. Microbiol.* 53, 1485–1494.
- 636 Pynaert, K., Smets, B.F., Wyffels, S., Beheydt, D., Siciliano, S.D., Verstraete, W., 2003.  
637 Characterization of an autotrophic nitrogen-removing biofilm from a highly loaded lab-  
638 scale rotating biological contactor. *Appl. Environ. Microbiol.* 69, 3626–3635.
- 639 Quast, C., Pruesse, E., Yilmaz, P., Gerken, J., Schweer, T., Yarza, P., Peplies, J., Glöckner,  
640 F.O., 2013. The SILVA ribosomal RNA gene database project: improved data  
641 processing and web-based tools. *Nucleic Acids Res.* 41, D590–D596.  
642 <https://doi.org/10.1093/nar/gks1219>
- 643 Schillinger, C., Petrich, A., Lux, R., Riep, B., Kikhney, J., Friedmann, A., Wolinsky, L.E.,  
644 Göbel, U.B., Daims, H., Moter, A., 2012. Co-localized or randomly distributed? Pair  
645 cross correlation of *in vivo* grown subgingival biofilm bacteria quantified by digital  
646 image analysis. *PLoS ONE* 7, e37583. <https://doi.org/10.1371/journal.pone.0037583>
- 647 Schramm, A., de Beer, D., van den Heuvel, J.C., Ottengraf, S., Amann, R., 1999. Microscale  
648 distribution of populations and activities of *Nitrosospira* and *Nitrospira* spp. along a  
649 macroscale gradient in a nitrifying bioreactor: quantification by *in situ* hybridization  
650 and the use of microsensors. *Appl. Environ. Microbiol.* 65, 3690–3696.
- 651 Schramm, A., de Beer, D., Wagner, M., Amann, R., 1998. Identification and activities *in situ*  
652 of *Nitrosospira* and *Nitrospira* spp. as dominant populations in a nitrifying fluidized  
653 bed reactor. *Appl. Environ. Microbiol.* 64, 3480–3485.
- 654 Schramm, A., Fuchs, B.M., Nielsen, J.L., Tonolla, M., Stahl, D.A., 2002. Fluorescence *in situ*  
655 hybridization of 16S rRNA gene clones (Clone-FISH) for probe validation and  
656 screening of clone libraries. *Env. Microbiol.* 4, 713–720.

- 657 Sliemers, A.O., Haaijer, S., Schmid, M., Harhangi, H., Verwegen, K., Kuenen, J.G., Jetten,  
658 M.S.M., 2004. Nitrification and anammox with urea as the energy source. *Syst. Appl.*  
659 *Microbiol.* 27, 271–278. <https://doi.org/10.1078/0723-2020-00259>
- 660 Stephen, J.R., McCaig, A.E., Smith, Z., Prosser, J.I., Embley, T.M., 1996. Molecular diversity  
661 of soil and marine 16S rRNA gene sequences related to beta-subgroup ammonia-  
662 oxidizing bacteria. *Appl. Environ. Microbiol.* 62, 4147–4154.
- 663 Trifinopoulos, J., Nguyen, L.-T., von Haeseler, A., Minh, B.Q., 2016. W-IQ-TREE: a fast  
664 online phylogenetic tool for maximum likelihood analysis. *Nucleic Acids Res.* 44,  
665 W232–W235. <https://doi.org/10.1093/nar/gkw256>
- 666 van Kessel, M.A.H.J., Speth, D.R., Albertsen, M., Nielsen, P.H., Op den Camp, H.J.M., Kartal,  
667 B., Jetten, M.S.M., Lücker, S., 2015. Complete nitrification by a single microorganism.  
668 *Nature* 528, 555–559.
- 669 Verhamme, D.T., Prosser, J.I., Nicol, G.W., 2011. Ammonia concentration determines  
670 differential growth of ammonia-oxidising archaea and bacteria in soil microcosms.  
671 *ISME J.* 5, 1067–1071. <https://doi.org/10.1038/ismej.2010.191>
- 672 Wagner, M., Erhart, R., Manz, W., Amann, R., Lemmer, H., Wedi, D., Schleifer, K.-H., 1994.  
673 Development of an rRNA-targeted oligonucleotide probe specific for the genus  
674 *Acinetobacter* and its application for in situ monitoring in activated sludge. *Appl.*  
675 *Environ. Microbiol.* 60, 792–800.
- 676 Wagner, M., Rath, G., Amann, R., Koops, H.-P., Schleifer, K.-H., 1995. In situ identification  
677 of ammonia-oxidizing bacteria. *Syst. Appl. Microbiol.* 18, 251–264.
- 678 Welch, J.L.M., Rossetti, B.J., Rieken, C.W., Dewhirst, F.E., Borisy, G.G., 2016. Biogeography  
679 of a human oral microbiome at the micron scale. *Proc. Natl. Acad. Sci. U.S.A.* 113,  
680 E791–E800. <https://doi.org/10.1073/pnas.1522149113>

- 681 Wells, G.F., Park, H.D., Yeung, C.H., Eggleston, B., Francis, C.A., Criddle, C.S., 2009.  
682 Ammonia-oxidizing communities in a highly aerated full-scale activated sludge  
683 bioreactor: betaproteobacterial dynamics and low relative abundance of *Crenarchaea*.  
684 *Env. Microbiol.* 11, 2310–2328. <https://doi.org/10.1111/j.1462-2920.2009.01958.x>
- 685 Winkler, M.K.H., Bassin, J.P., Kleerebezem, R., Sorokin, D.Y., van Loosdrecht, M.C.M.,  
686 2012. Unravelling the reasons for disproportion in the ratio of AOB and NOB in aerobic  
687 granular sludge. *Appl. Microbiol. Biotechnol.* 94, 1657–1666.
- 688 Zhou, L.-J., Han, P., Yu, Y., Wang, B., Men, Y., Wagner, M., Wu, Q.L., 2019. Cometabolic  
689 biotransformation and microbial-mediated abiotic transformation of sulfonamides by  
690 three ammonia oxidizers. *Water Res.* 159, 444–453.  
691 <https://doi.org/10.1016/j.watres.2019.05.031>  
692

693 **Tables**

694 **Table 1.** rRNA-targeted oligonucleotide probes used in this study. Probe Gam42a binds to the 23S rRNA, whereas all other listed probes target  
 695 binding sites on the 16S rRNA.

| Probe                              | Intended target organisms                   | Probe sequence (5'-3') | Competitors and their sequences (5'-3') <sup>a</sup> | FA <sup>b</sup> (%) | Fluorophore <sup>c</sup> | Reference             |
|------------------------------------|---------------------------------------------|------------------------|------------------------------------------------------|---------------------|--------------------------|-----------------------|
| L-C-gProt-1027-a-A-17 (Gam42a)     | Gammaproteobacteria                         | GCCTTCCCACATCGTTT      | GCCTTCCCACACTTCGTTT                                  | 35                  | Cy3                      | Manz et al., 1992     |
| S-D-Bact-0338-a-A-18 (EUB338-I)    | Most bacteria                               | GCTGCCTCCCGTAGGAGT     |                                                      | 35                  | FITC, Atto565            | Amann et al., 1990    |
| S-*-BactP-0338-a-A-18 (EUB338-II)  | Planctomycetales and various other bacteria | GCAGCCACCCGTAGGTGT     |                                                      | 35                  | FITC, Atto565            | Daims et al., 1999    |
| S-*-BactV-0338-a-A-18 (EUB338-III) | Verrucomicrobia and various other bacteria  | GCTGCCACCCGTAGGTGT     |                                                      | 35                  | FITC, Atto565            | Daims et al., 1999    |
| S-F-bAOB-1224-a-A-20 (Nso1225)     | Most $\beta$ -AOB                           | CGCCATTGTATTACGTGTGA   |                                                      | 35                  | Cy3                      | Mobarry et al., 1996  |
| S-*-Nsm-0651-a-A-18 (NEU)          | <i>Nitrosomonas europaea</i> (in cluster 7) | CCCCTCTGCTGCACTCTA     | TTCCATCCCCCTTGCCG                                    | 35-40               | FITC                     | Wagner et al., 1995   |
| S-*-Nsm6a-0192-a-A-20 (Cl6a192)    | <i>N. oligotropha</i> lineage (cluster 6a)  | CTTTCGATCCCCTACTTTCC   | CTTTCGATCCCCTGCTTTCC                                 | 35                  | Cy5                      | Adamczyk et al., 2003 |
| Ncom1025                           | <i>N. communis</i> lineage (cluster 8)      | CTCGATTCCCTTTCGGGCA    |                                                      | 35                  | Atto490LS, Cy3           | Juretschko, 2000      |



|                                                        |                                                                                                          |                          |                                                    |    |                          |                          |
|--------------------------------------------------------|----------------------------------------------------------------------------------------------------------|--------------------------|----------------------------------------------------|----|--------------------------|--------------------------|
| “Old AOB probe mix” (Nso1225, Cl6a192, Ncom1025, NEU)  | Most $\beta$ -AOB                                                                                        |                          |                                                    | 35 | Cy3, Atto488             | As for the single probes |
| Nm_OL_703                                              | <i>N. oligotropha</i> , <i>N. ureae</i> , <i>N. aestuarii</i> , <i>N. marina</i> lineage (cluster 6a+6b) | GCCATCGATGTTCTTCCATATCTC | GCCATCGGTGTTCTCCATATCTC<br>GCCATCGGTGTTCTCCACATCTC | 35 | Atto532                  | This study               |
| Nm_EU_136                                              | <i>N. europaea</i> , <i>N. eutropha</i> , <i>N. mobilis</i> lineage (cluster 7)                          | CGATGCGTTATTCCCCACTTAAGG | CGATGCGTTATCCCCACTTAAGG                            | 35 | Atto633                  | This study               |
| Nm_CR_998                                              | <i>N. cryotolerans</i> lineage                                                                           | CTCAGCGAGCTTAGATACAT     | CTCAGCGAGCTTCGGTACAT<br>CTCAGCGGGCTTCGATACAT       | 20 | DY-681                   | This study               |
| Nm_143_1010                                            | <i>Nitrosomonas sp.</i> Nm143 lineage                                                                    | GGGCACGCCTACCTCTCAGT     | GGGCACGCCACCTCTCAGC                                | 35 | FITC                     | This study               |
| Nsp441                                                 | <i>Nitrospira</i> lineage (clusters 0-4)                                                                 | GTGACCGTTTCGTTCCGGCT     | GTAACCGTTTCTTTCCGGCT                               | 20 | Atto565                  | This study               |
| Nm_CO_1457                                             | <i>N. communis</i> lineage (cluster 8)                                                                   | AACTCTCACCGTGGCAAACGCC   | GAATCTCACCGTGGCAAACGCC                             | 35 | Atto490LS                | This study               |
| Nm_NI_1026                                             | DK-WWTP lineage                                                                                          | GTCTTAATCCCTTTCGGGC      |                                                    | 35 | Atto594                  | This study               |
| “New AOB probe mix” (Nm_OL_703, Nm_EU_136, Nm_CO_1457) | Most $\beta$ -AOB known to be relevant in WWTPs                                                          |                          |                                                    | 35 | As for the single probes | This study               |

696 <sup>a</sup> Competitors were added as unlabeled oligonucleotides and in equimolar concentrations as the labeled probes.

697 <sup>b</sup> FA, formamide. The formamide concentration in the hybridization buffer in per cent (v/v) is indicated.

698 <sup>c</sup> Probes were 5'-labeled with these fluorophores. Details of all listed dyes are provided elsewhere (Lukumbuzya et al., 2019).

699 **Table 2.** Overview of the WWTPs, which were the source of activated sludge samples analyzed in this study.

| <b>WWTP (abbreviations)</b> | <b>Location<sup>a</sup></b> | <b>Sampling date (month/year)</b> | <b>Type of WWTP/reactor</b>                                                                                                                                                |
|-----------------------------|-----------------------------|-----------------------------------|----------------------------------------------------------------------------------------------------------------------------------------------------------------------------|
| KNB                         | Klosterneuburg, AT          | 10/2014, 10/2015                  | Municipal. Sequencing batch reactor that treats reject water from sludge dewatering after anaerobic digestion.                                                             |
| SBBR1                       | Ingolstadt, DE              | 3/1998                            | Municipal. Previous pilot-size sequencing biofilm batch reactor that treated reject water from sludge dewatering after anaerobic digestion.                                |
| ING                         | Ingolstadt, DE              | 3/2011                            | Municipal. Denitrifying-nitrifying tank.                                                                                                                                   |
| CP Kelco                    | Lille Skensved, DK          | 12/2014                           | Industrial. 300,000 PE full-scale wastewater treatment plant with biological nutrient removal, recirculation and anaerobic digestion.                                      |
| Esbjerg E                   | Esberg, DK                  | 8/2016                            | Municipal. 150,000 PE full-scale wastewater treatment plant with biological nutrient removal, recirculation, primary settling and anaerobic digestion.                     |
| Kalundborg                  | Kalundborg, DK              | 8/2010                            | Municipal. 50,000 PE full-scale wastewater treatment plant with enhanced biological phosphorus removal, intermittent aeration.                                             |
| Lundtofte                   | Lyngby, DK                  | 8/2010                            | Municipal. 150,000 PE full-scale wastewater treatment plant with enhanced biological phosphorus removal, intermittent aeration, primary settling, and anaerobic digestion. |
| Odense NW                   | Odense, DK                  | 11/2014                           | Municipal. 51,000 PE full-scale wastewater treatment plant with biological nutrient removal and intermittent aeration, primary settling and anaerobic digestion.           |

700 <sup>a</sup> Abbreviations: AT, Austria; DE, Germany; DK, Denmark.

701

702 **Table 3.** *In silico* analysis of the target group coverage and specificity of previously published and newly designed 16S rRNA-targeted probes for  
703  $\beta$ -AOB. Numbers in the table header (in parentheses) are the numbers of analyzed full-length 16S rRNA gene sequences from the respective  
704 lineage in the SILVA Ref\_NR99 (release 132) and MiDAS databases. Numbers in all other rows indicate the fractions (in per cent) of the lineages  
705 that are targeted by the probes without any nucleotide mismatch. Numbers in parentheses indicate the fractions (in per cent) targeted by the probes  
706 with up to 1.5 weighted mismatches according to the ARB “probe match” tool. Table cells of the intended probe target groups are marked grey.  
707 Those non-target organisms of a probe, which are discriminated by the competitor listed in Table 1, are not included in the listed fractions.

| Probe       | All $\beta$ -AOB (505) | <i>Nitrospira</i> (cluster 0-4) (153) | <i>N. oligotropha</i> ,<br><i>N. ureae</i> (cluster 6a) (157) | <i>N. marina</i> ,<br><i>N. aestuarii</i> (cluster 6b) (58) | <i>N. europaea</i> ,<br><i>N. eutropha</i> , <i>N. halophila</i> (cluster 7) (86) | <i>N. mobilis</i> (cluster 7) (11) | <i>N. communis</i> ,<br><i>N. nitrosa</i> (cluster 8) (21) | DK-WWTP lineage (3) | <i>N. cryotolerans</i> lineage (1) | <i>N. sp.</i> Nm143 lineage (1) |
|-------------|------------------------|---------------------------------------|---------------------------------------------------------------|-------------------------------------------------------------|-----------------------------------------------------------------------------------|------------------------------------|------------------------------------------------------------|---------------------|------------------------------------|---------------------------------|
| Nso1225     | 94.9                   | 100                                   | 93.0                                                          | 41.4                                                        | 95.4                                                                              | 45.5                               | 95.2                                                       | 100                 | 100                                | 100                             |
| Nso190      | 42.6                   | 96.1                                  | 0                                                             | 12.1                                                        | 58.1                                                                              | 9.1                                | 0                                                          | 0                   | 100                                | 100                             |
| Nsm156      | 64.2                   | 3.3                                   | 90.9                                                          | 93.1                                                        | 94.2                                                                              | 90.9                               | 100                                                        | 0                   | 100                                | 100                             |
| Nsv443      | 15.6                   | 51.6                                  | 0                                                             | 0                                                           | 0                                                                                 | 0                                  | 0                                                          | 0                   | 0                                  | 0                               |
| Nsp441      | 15.8                   | 52.3                                  | 0                                                             | 0                                                           | 0                                                                                 | 0                                  | 0                                                          | 0                   | 0                                  | 0                               |
| Cl6a192     | 16.2                   | 0                                     | 49.7                                                          | 6.9                                                         | 0                                                                                 | 0                                  | 0                                                          | 0                   | 0                                  | 0                               |
| Nm_OL_703   | 36.4                   | 0                                     | 80.3                                                          | 100                                                         | 0                                                                                 | 0                                  | 0                                                          | 0                   | 0                                  | 0                               |
| NEU         | 13.1                   | 0 (28.1)                              | 0 (31.21)                                                     | 0                                                           | 75.6 (93.0)                                                                       | 0 (63.7)                           | 0                                                          | 0                   | 0 (100)                            | 0 (100)                         |
| NmV         | 1.4                    | 0                                     | 0                                                             | 1.7                                                         | 0                                                                                 | 54.6                               | 0                                                          | 0                   | 0                                  | 0                               |
| Nm_EU_136   | 14.7                   | 0                                     | 0                                                             | 1.7                                                         | 75.6                                                                              | 81.8                               | 0                                                          | 0                   | 0                                  | 0                               |
| Ncom1025    | 3.4                    | 0                                     | 0                                                             | 0                                                           | 0                                                                                 | 0 (72.7)                           | 81.0                                                       | 0                   | 0                                  | 0                               |
| Nm_CO_1457  | 3.4                    | 0                                     | 0                                                             | 0                                                           | 0                                                                                 | 0                                  | 81.0                                                       | 0                   | 0                                  | 0                               |
| Nm_NI_1026  | 0.6                    | 0                                     | 0                                                             | 0                                                           | 0                                                                                 | 0                                  | 0                                                          | 100                 | 0                                  | 0                               |
| Nm_CR_998   | 0.2                    | 0                                     | 0                                                             | 0                                                           | 0                                                                                 | 0                                  | 0                                                          | 0                   | 100                                | 0                               |
| Nm_143_1010 | 0.2                    | 0                                     | 0                                                             | 0                                                           | 0                                                                                 | 0                                  | 0                                                          | 0                   | 0                                  | 100                             |

708

709 **Table 4.** Quantification of the biovolume fractions of  $\beta$ -AOB in seven WWTPs using the old and the new AOB probe mixtures.

| WWTP       | Previously published AOB probe mix |                | Newly designed AOB probe mix |                |
|------------|------------------------------------|----------------|------------------------------|----------------|
|            | Biovolume fraction (%)             | Congruency (%) | Biovolume fraction (%)       | Congruency (%) |
| CP Kelco   | 2.5                                | 97             | 0.8                          | 98             |
| Esbjerg E  | 1.1                                | 97             | 1.3                          | 94             |
| Kalundborg | 1.5                                | 99             | 1.2                          | 99             |
| Lundtofte  | 0.5                                | 99             | 0.8                          | 97             |
| Odense NW  | 1.2                                | 98             | 1.1                          | 95             |
| KNB        | 1.3                                | 96             | 1.6                          | 98             |
| ING        | 0.9                                | 93             | 1.4                          | 97             |

710
